# Supplementary material for: Combining magnetic hyperthermia and dual T1/T2 MR imaging using highly versatile iron oxide nanoparticles
Source: Royal Society of Chemistry journal article supplement (doi:10.1039/c8dt04685a), 2019-01-01
Supplement: c8dt04685a1.pdf [file c8dt04685a1.pdf]

**Supporting Information for:**

**Combining Magnetic Hyperthermia and dual  $T_1/T_2$  MR  
Imaging Using Highly Versatile Iron Oxide Nanoparticles**

*Santiago Sánchez-Cabezas<sup>a</sup>, Roberto Montes-Robles<sup>a</sup>, Juan Gallo<sup>c</sup>, Félix  
Sancenón<sup>a,b</sup> and Ramón Martínez-Máñez<sup>a,b</sup>*

<sup>a</sup> Instituto Interuniversitario de Investigación de Reconocimiento Molecular y Desarrollo Tecnológico (IDM), Universitat Politècnica de València. Camino de Vera s/n. 46022 Valencia, Spain

<sup>b</sup> CIBER de Bioingeniería, Biomateriales y Nanomedicina (CIBER-BBN), Spain

<sup>c</sup> Advanced (Magnetic) Theranostic Nanostructures Group, INL - International Iberian Nanotechnology Laboratory, Av. Mestre José Veiga, 4715-330 Braga, Portugal

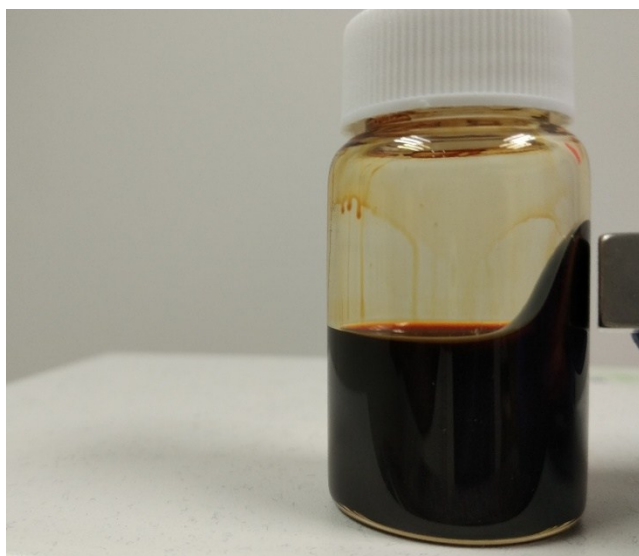

**Figure S1:** Magnetic colloidal fluid (ferrofluid) composed of oleate-coated USPIOs suspended in chloroform.

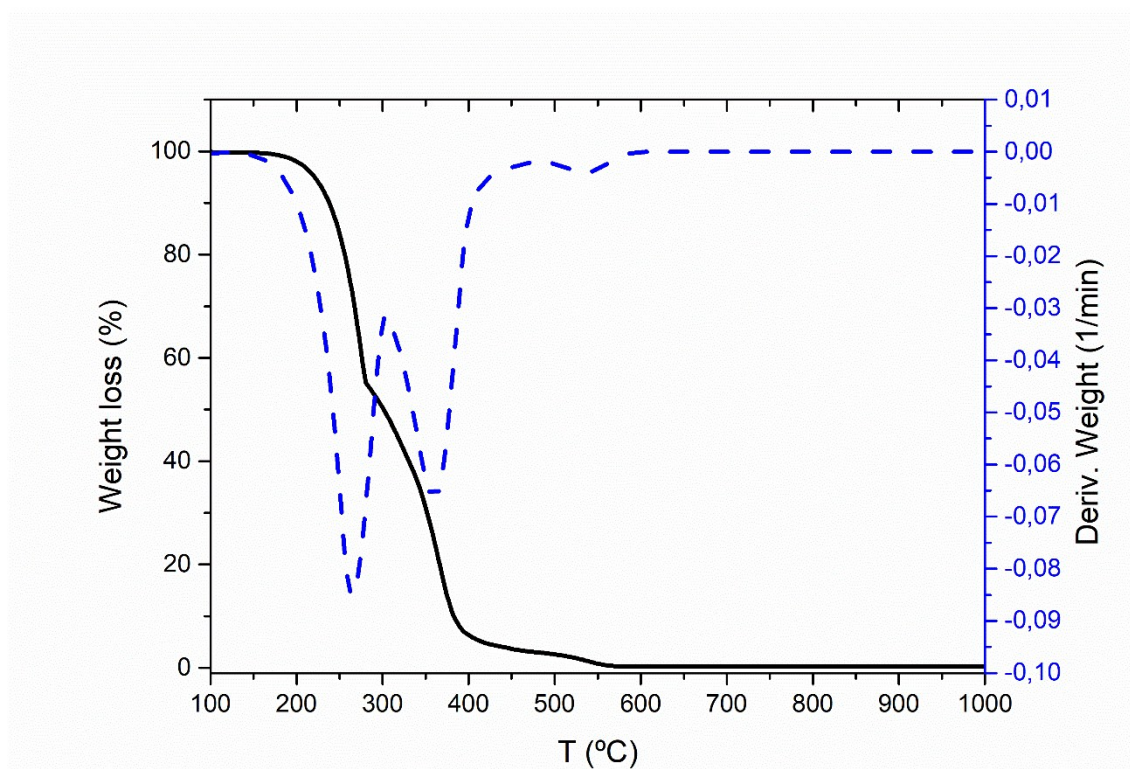

**Figure S2:** TGA and DGT of pure oleic acid.

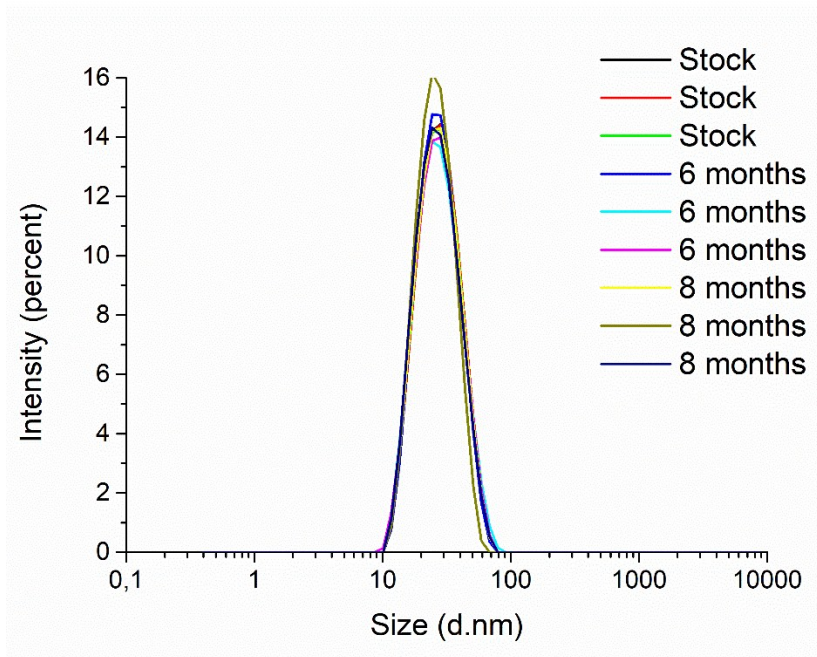

**Figure S3:** Intensity-weighted hydrodynamic size distributions of the ferrofluid over time. Each measurement was repeated three times.

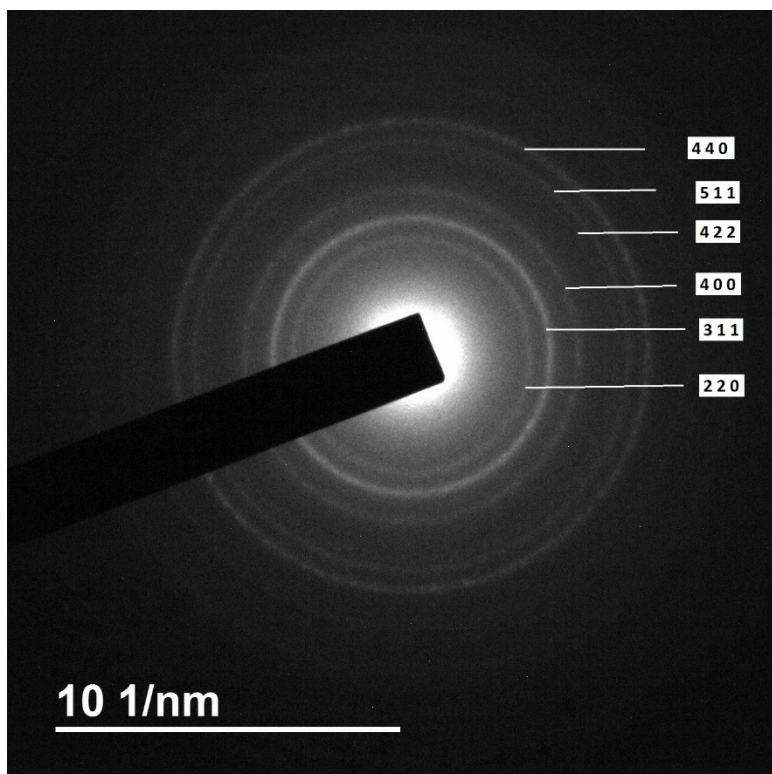

**Figure S4:** SAED image of oleate-coated USPIONs taken 8 months after the preparation of the ferrofluid. The diffraction rings match the main diffraction planes of magnetite (JCPDS file no. 19-0629)

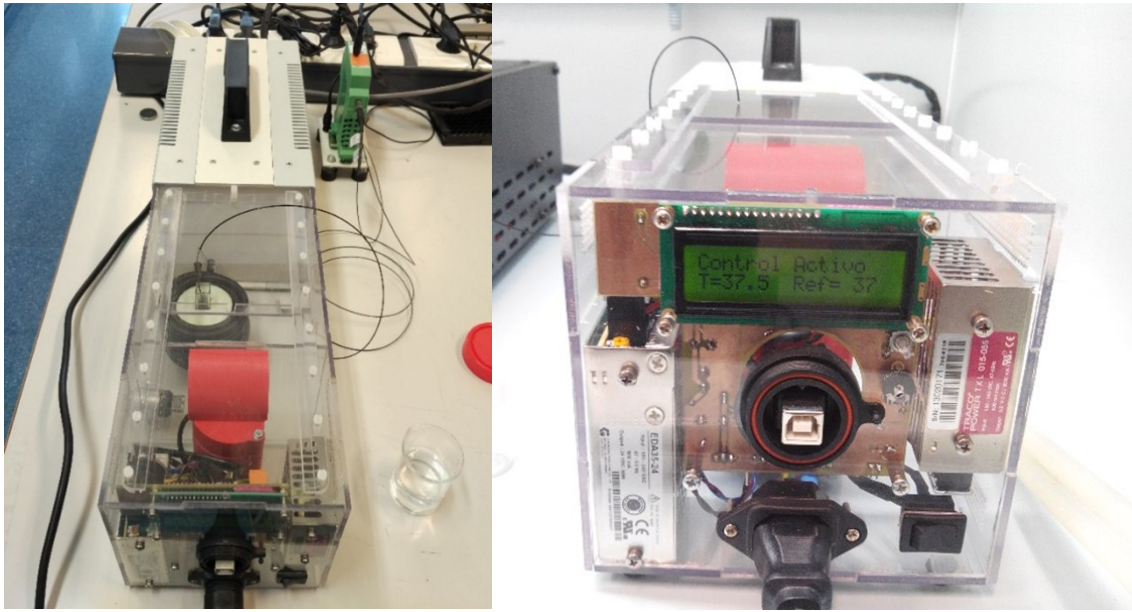

**Figure S5:** Experimental setup for hyperthermia calorimetric experiments (left). Both the sample and the magnetic induction coil were placed inside a thermostatic chamber with an automated temperature regulator (right).

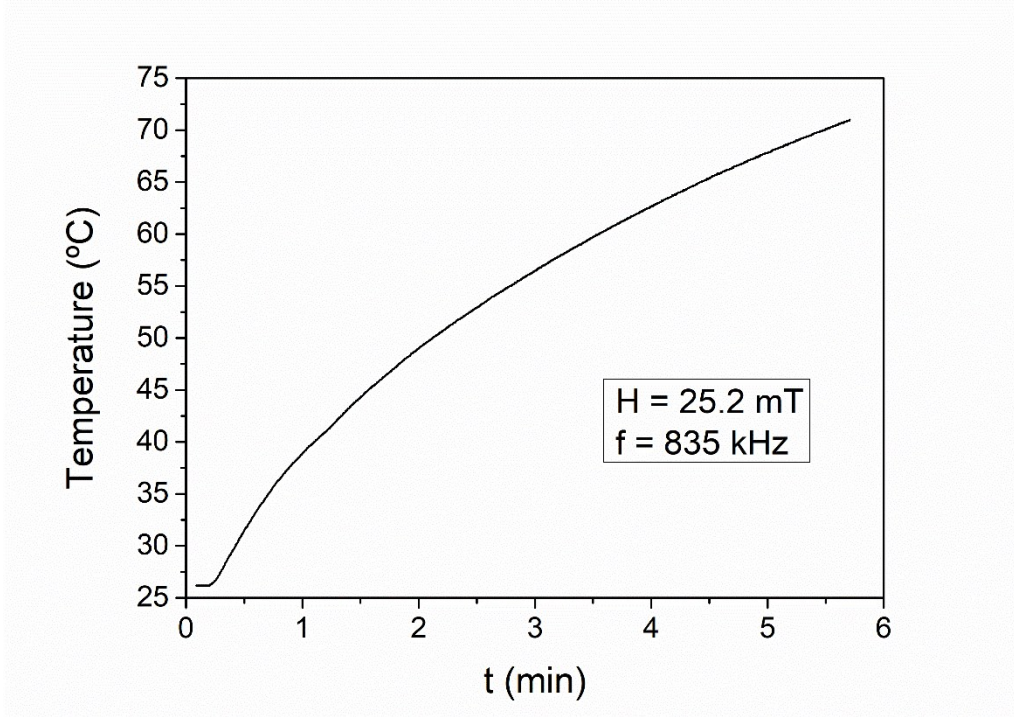

**Figure S6:** Heating curve of sample *d* (4.5 mg NPs/ml) measured in the commercial hyperthermia equipment at  $H=25.2$  mT and  $f=835$  kHz.

### Supplementary Calculations: Ligand density

The average volume of a single magnetite nanoparticle ( $V_{NP} = 572.15 \text{ nm}^3$ ) was obtained from equation (S1), where  $R$  is the average nanoparticle radius obtained from TEM image analysis ( $R = 5.15 \text{ nm}$ ):

$$V_{NP} = \frac{4}{3} \pi R^3 \quad (S1)$$

The average mass of a single nanoparticle ( $m_{NP} = 2.96 \cdot 10^{-18} \text{ g}$ ) was calculated from equation (S2), where  $d$  is the density of magnetite ( $d = 5.18 \text{ g/cm}^3$ ):

$$m_{NP} = d \cdot V_{NP} \quad (S2)$$

If we consider 1 g of oleate-coated USPIOs, the amount of oleate ( $m_o$ ) and magnetite ( $m_{USPIOs}$ ) can be estimated using the results from the TGA analysis: 20.5 % (w/w). The ligand density ( $l_d = 1635$  oleate molecules/nanoparticle), can be obtained from equation (S3) using the molecular weight of oleate ( $M_w = 281.46 \text{ g/mol}$ ) and the Avogadro's number ( $N_A = 6.022 \cdot 10^{23}$ ):

$$l_d = \frac{\left(\frac{m_o}{M_w}\right) \cdot N_A}{\frac{m_{USPIOs}}{m_{NP}}} \quad (S3)$$
